# Supplementary material for: Decoding preparatory movement state-based motor imagery with multi layer energy decoder
Source: Research Square preprint supplement (doi:10.21203/rs.3.rs-7187266/v1), 2025-07-29
Supplement: Supplementary file 1 [file 9683c461735666ad4b4c32b0.docx]

**Decoding preparatory movement state-based motor imagery with multi layer energy decoder**

**Supplementary material**


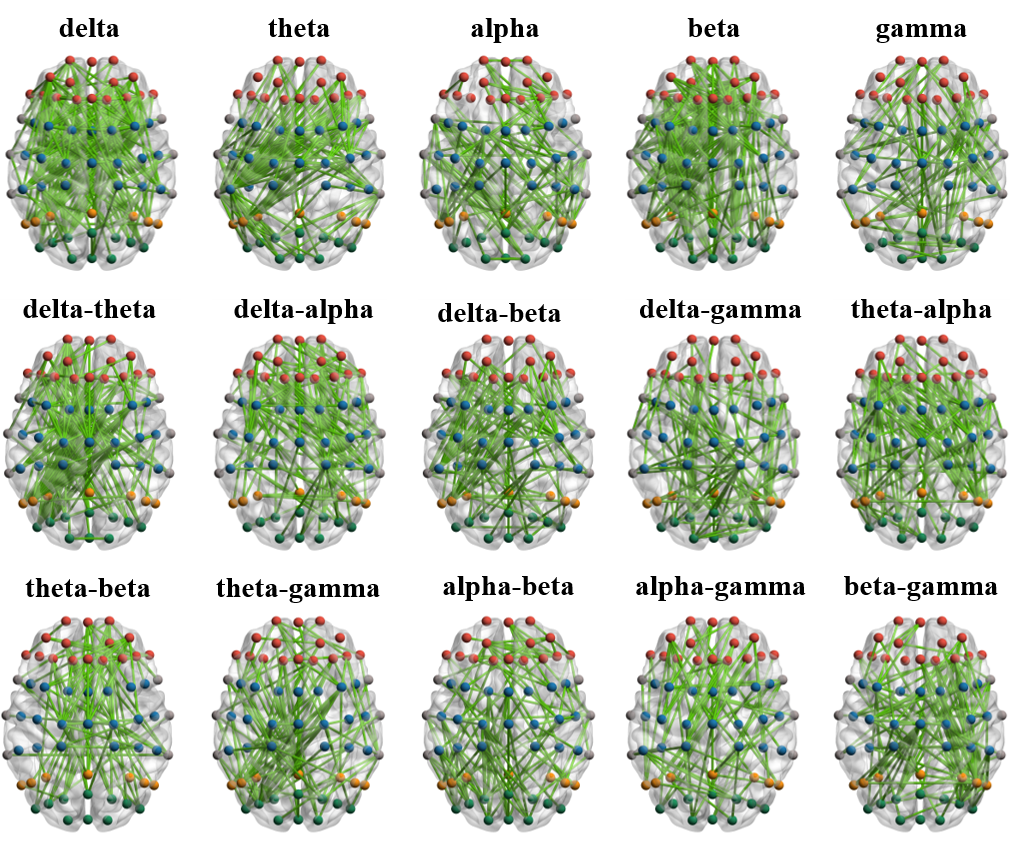


Fig. S1. Statistically significant patterns of brain network connectivity of intra-frequency and cross-frequency for AO-MI.


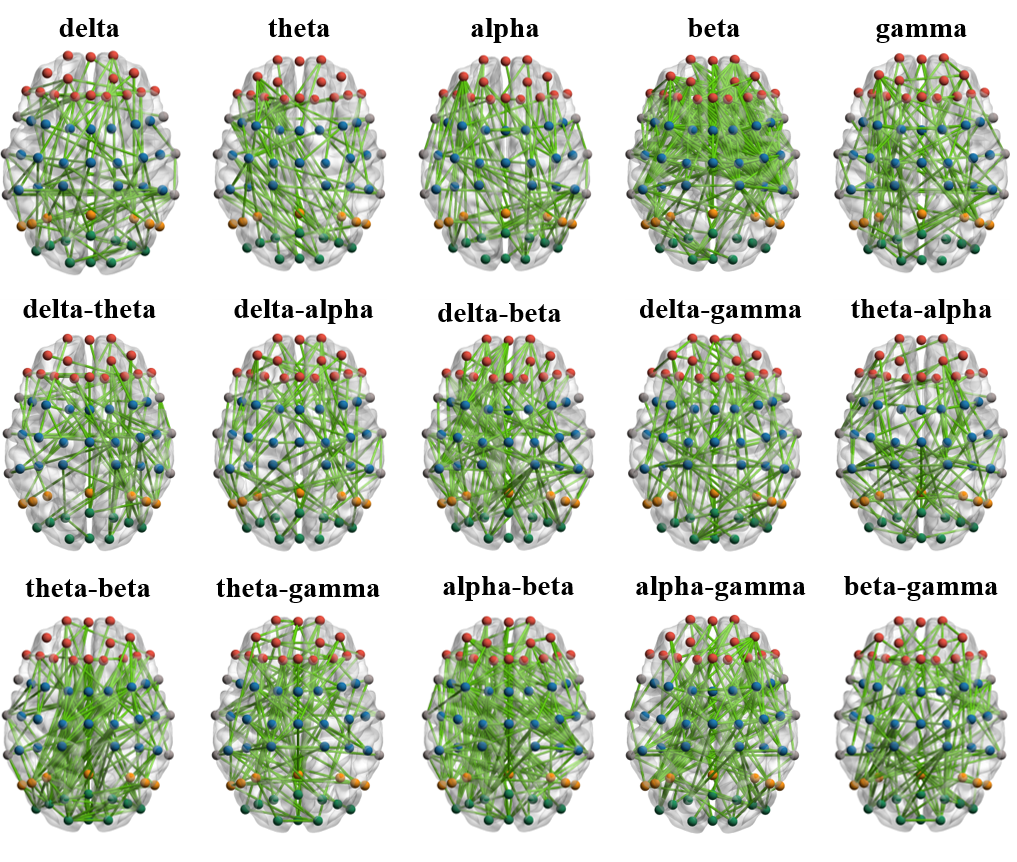


Fig. S2. Statistically significant patterns of brain network connectivity of intra-frequency and cross-frequency for PMS-MI during prepared movement period.


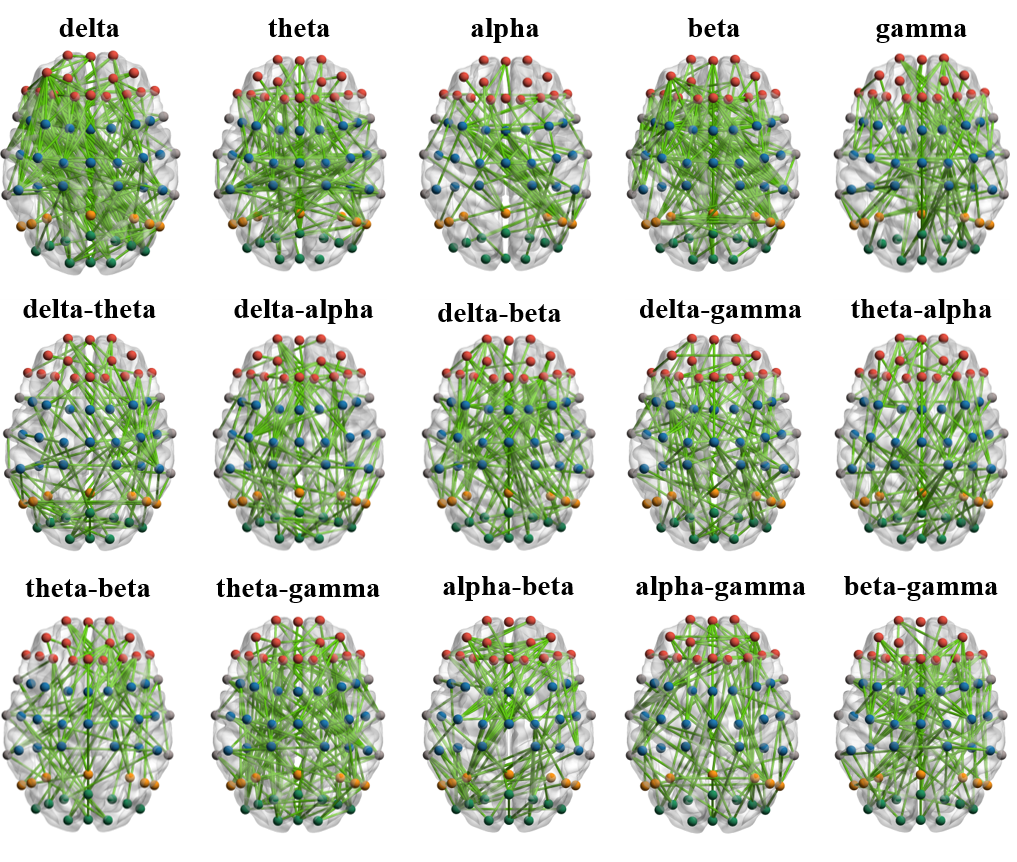


Fig. S3. Statistically significant patterns of brain network connectivity of intra-frequency and cross-frequency for PMS-MI during MI period.
